# Supplementary material for: Predicting the prognosis of hepatocellular carcinoma based on genes related to polyamine metabolism
Source: PeerJ journal article supplement (doi:10.7717/peerj.19985), 2025-09-22
Supplement: MIQE_checklist.xlsx [file MIQE_checklist.xlsx]

## Sheet: Sheet1
ITEM TO CHECK	IMPORTANCE	CHECKLIST
EXPERIMENTAL DESIGN
Definition of experimental and control groups	E	Page10 Line204-205
Number within each group	E	Page10 Line204-205
Assay carried out by core lab or investigator's lab?	D	Not Applicable
Acknowledgement of authors' contributions	D	Not Applicable
SAMPLE
Description	E	Page10 Line204-210
Volume/mass of sample processed	D	Not Applicable
Microdissection or macrodissection	E	Page11 Line212-225
Processing procedure	E	Page11 Line212-225
If frozen - how and how quickly?	E	Page11 Line212-225
If fixed - with what, how quickly?	E	Page11 Line212-225
Sample storage conditions and duration (especially for FFPE samples)	E	Page11 Line212-225
NUCLEIC ACID EXTRACTION
Procedure and/or instrumentation	E	Page11 Line212-225
Name of kit and details of any modifications	E	Page11 Line212-225
Source of additional reagents used	D	Not Applicable
Details of DNase or RNAse treatment	E	Page11 Line212-225
Contamination assessment (DNA or RNA)	E	Page11 Line212-225
Nucleic acid quantification	E	Page11 Line212-225
Instrument and method	E	Page11 Line212-225
Purity (A260/A280)	D	Not Applicable
Yield	D	Not Applicable
RNA integrity method/instrument	E	Page11 Line212-225
RIN/RQI or Cq of 3' and 5' transcripts	E	Page11 Line212-225
Electrophoresis traces	D	Not Applicable
Inhibition testing (Cq dilutions, spike or other)	E	Page11 Line212-225
REVERSE TRANSCRIPTION
Complete reaction conditions	E	Page11 Line212-225
Amount of RNA and reaction volume	E	Page11 Line212-225
Priming oligonucleotide (if using GSP) and concentration	E	Page11 Line212-225
Reverse transcriptase and concentration	E	Page11 Line212-225
Temperature and time	E	Page11 Line212-225
Manufacturer of reagents and catalogue numbers	D	Not Applicable
Cqs with and without RT	D*	Not Applicable
Storage conditions of cDNA	D	Not Applicable
qPCR TARGET INFORMATION
If multiplex, efficiency and LOD of each assay.	E	Page11 Line212-225
Sequence accession number	E	Page11 Line212-225
Location of amplicon	D	Not Applicable
Amplicon length	E	Page11 Line212-225
In silico specificity screen (BLAST, etc)	E	Page11 Line212-225
Pseudogenes, retropseudogenes or other homologs?	D	Not Applicable
Sequence alignment	D	Not Applicable
Secondary structure analysis of amplicon	D	Not Applicable
Location of each primer by exon or intron (if applicable)	E	Page11 Line212-225
What splice variants are targeted?	E	Page11 Line212-225
qPCR OLIGONUCLEOTIDES
Primer sequences	E	Page11 Line212-225
RTPrimerDB Identification Number	D	Not Applicable
Probe sequences	D**	Not Applicable
Location and identity of any modifications	E	Page11 Line212-225
Manufacturer of oligonucleotides	D	Not Applicable
Purification method	D	Not Applicable
qPCR PROTOCOL
Complete reaction conditions	E	Page11 Line212-225
Reaction volume and amount of cDNA/DNA	E	Page11 Line212-225
Primer, (probe), Mg++ and dNTP concentrations	E	Page11 Line212-225
Polymerase identity and concentration	E	Page11 Line212-225
Buffer/kit identity and manufacturer	E	Page11 Line212-225
Exact chemical constitution of the buffer	D	Not Applicable
Additives (SYBR Green I, DMSO, etc.)	E	Page11 Line212-225
Manufacturer of plates/tubes and catalog number	D	Not Applicable
Complete thermocycling parameters	E	Page11 Line212-225
Reaction setup (manual/robotic)	D	Not Applicable
Manufacturer of qPCR instrument	E	Page11 Line212-225
qPCR VALIDATION
Evidence of optimisation (from gradients)	D	Not Applicable
Specificity (gel, sequence, melt, or digest)	E	Page11 Line212-225
For SYBR Green I, Cq of the NTC	E	Page11 Line212-225
Standard curves with slope and y-intercept	E	Page11 Line212-225
PCR efficiency calculated from slope	E	Page11 Line212-225
Confidence interval for PCR efficiency or standard error	D	Not Applicable
r2 of standard curve	E	Page11 Line212-225
Linear dynamic range	E	Page11 Line212-225
Cq variation at lower limit	E	Page11 Line212-225
Confidence intervals throughout range	D	Not Applicable
Evidence for limit of detection	E	Page11 Line212-225
If multiplex, efficiency and LOD of each assay.	E	Page11 Line212-225
DATA ANALYSIS
qPCR analysis program (source, version)	E	Page11 Line212-225
Cq method determination	E	Page11 Line212-225
Outlier identification and disposition	E	Page11 Line212-225
Results of NTCs	E	Page11 Line212-225
Justification of number and choice of reference genes	E	Page11 Line212-225
Description of normalisation method	E	Page11 Line212-225
Number and concordance of biological replicates	D	Not Applicable
Number and stage (RT or qPCR) of technical replicates	E	Page11 Line212-225
Repeatability (intra-assay variation)	E	Page11 Line212-225
Reproducibility (inter-assay variation, %CV)	D	Not Applicable
Power analysis	D	Not Applicable
Statistical methods for result significance	E	Page11 Line212-225
Software (source, version)	E	Page11 Line212-225
Cq or raw data submission using RDML	D	Not Applicable
Table 1. MIQE checklist for authors, reviewers and editors. All essential information (E) must be submitted with the manuscript. Desirable
information (D) should be submitted if available. If using primers obtained from RTPrimerDB, information on qPCR target, oligonucleotides,
protocols and validation is available from that source.
*: Assessing the absence of DNA using a no RT assay is essential when first extracting RNA. Once the sample has been validated as
RDNA-free, inclusion of a no-RT control is desirable, but no longer essential.
**: Disclosure of the probe sequence is highly desirable and strongly encouraged. However, since not all commercial pre-designed assay
vendors provide this information, it cannot be an essential requirement. Use of such assays is advised against.
