# Supplementary material for: Predicting the prognosis of hepatocellular carcinoma based on genes related to polyamine metabolism
Source: PeerJ journal article supplement (doi:10.7717/peerj.19985), 2025-09-22
Supplement: Table_S1.docx [file Table_S1.docx]

Table S1. Primer sequences used in this study.

| Gene | Accession No. | Primers (5’-3’) | |
| --- | --- | --- | --- |
| Forward | Reverse |
| *G6PD* | NM_000402 | CTGTTCCGTGAGGACCAGATCT | TGAAGGTGAGGATAACGCAGGC |
| *AKR1B15* | NM_001080538 | GAGGACCTGTTCATCGTCAGCA | CGTCCAGATAGCTCAGCTTCAG |
| *S100A9* | NM_002965 | GCACCCAGACACCCTGAACCA | TGTGTCCAGGTCCTCCATGATG |
| *ADH4* | NM_000670 | CCTTGACTGTGCAGGTGGATCT | GTCAATCCTTTGCTACCAGCAGC |
| *GAPDH* | NM_002046 | GTCTCCTCTGACTTCAACAGCG | ACCACCCTGTTGCTGTAGCCAA |
